# Supplementary material for: Beyond Frequency Bands: Complementary-Ensemble-Empirical-Mode-Decomposition-Enhanced Microstate Sequence Non-Randomness Analysis for Aiding Diagnosis and Cognitive Prediction of Dementia
Source: MDPI journal article supplement (doi:10.3390/brainsci14050487), 2024-05-11
Supplement: s1 [file s1]

**Table S1.** Detailed MMSE scores for each subject

| Subject | Group | MMSE | Subject | Group | MMSE | Subject | Group | MMSE |
|---------|-------|------|---------|-------|------|---------|-------|------|
| 1       | HC    | 30   | 31      | FTD   | 24   | 61      | AD    | 23   |
| 2       | HC    | 30   | 32      | FTD   | 25   | 62      | AD    | 20   |
| 3       | HC    | 30   | 33      | FTD   | 22   | 63      | AD    | 22   |
| 4       | HC    | 30   | 34      | FTD   | 22   | 64      | AD    | 18   |
| 5       | HC    | 30   | 35      | FTD   | 20   | 65      | AD    | 20   |
| 6       | HC    | 30   | 36      | FTD   | 18   | 66      | AD    | 14   |
| 7       | HC    | 30   | 37      | FTD   | 22   | 67      | AD    | 18   |
| 8       | HC    | 30   | 38      | FTD   | 20   | 68      | AD    | 14   |
| 9       | HC    | 30   | 39      | FTD   | 22   | 69      | AD    | 6    |
| 10      | HC    | 30   | 40      | FTD   | 24   | 70      | AD    | 23   |
| 11      | HC    | 30   | 41      | FTD   | 22   | 71      | AD    | 14   |
| 12      | HC    | 30   | 42      | FTD   | 22   | 72      | AD    | 4    |
| 13      | HC    | 30   | 43      | FTD   | 18   | 73      | AD    | 22   |
| 14      | HC    | 30   | 44      | FTD   | 20   | 74      | AD    | 20   |
| 15      | HC    | 30   | 45      | FTD   | 18   | 75      | AD    | 16   |
| 16      | HC    | 30   | 46      | FTD   | 27   | 76      | AD    | 20   |
| 17      | HC    | 30   | 47      | FTD   | 20   | 77      | AD    | 20   |
| 18      | HC    | 30   | 48      | FTD   | 24   | 78      | AD    | 18   |
| 19      | HC    | 30   | 49      | FTD   | 26   | 79      | AD    | 16   |
| 20      | HC    | 30   | 50      | FTD   | 26   | 80      | AD    | 20   |
| 21      | HC    | 30   | 51      | FTD   | 24   | 81      | AD    | 16   |
| 22      | HC    | 30   | 52      | FTD   | 24   | 82      | AD    | 20   |
| 23      | HC    | 30   | 53      | AD    | 16   | 83      | AD    | 22   |
| 24      | HC    | 30   | 54      | AD    | 22   | 84      | AD    | 20   |
| 25      | HC    | 30   | 55      | AD    | 14   | 85      | AD    | 20   |
| 26      | HC    | 30   | 56      | AD    | 20   | 86      | AD    | 18   |
| 27      | HC    | 30   | 57      | AD    | 22   | 87      | AD    | 22   |
| 28      | HC    | 30   | 58      | AD    | 14   | 88      | AD    | 9    |
| 29      | HC    | 30   | 59      | AD    | 20   |         |       |      |
| 30      | FTD   | 20   | 60      | AD    | 16   |         |       |      |
